# Supplementary material
Source: publisher figshare collection journal article supplement (https://tandf.figshare.com/articles/dataset/_/11604204)
Supplement: Supplementary file 1 [file 1]

**Supplementary Table S1: Bioinformatic analysis of the detected splice variant**

| <b>Tool</b>                | <b>Splice variant</b>                                  | <b>Wild allele</b>                                 | <b>References; URL</b>                                                                                                                                         |
|----------------------------|--------------------------------------------------------|----------------------------------------------------|----------------------------------------------------------------------------------------------------------------------------------------------------------------|
| NetGene2 v.2.4             | Splice site lost                                       | Confidence<br>0.81                                 | Brunak et al. 1991<br><a href="http://www.cbs.dtu.dk/services/NetGene2/">www.cbs.dtu.dk/services/NetGene2/</a>                                                 |
| MaxEntScan<br>MAXENT: 1.12 | MAXENT: 11.08<br>MDD: 14.68<br>MM: 11.77<br>WMM: 11.87 | MAXENT: 1.12<br>MDD: 6.68<br>MM: 2.33<br>WMM: 2.53 | Yeo et al. 2004<br><a href="http://genes.mit.edu/burgelab/maxent/Xmaxentscan_scoreseq.html">http://genes.mit.edu/burgelab/maxent/Xmaxentscan_scoreseq.html</a> |
| NNSPLICE 0.9               | Splice site lost                                       | Score 1.0                                          | Reese et al. 1997<br><a href="http://www.fruitfly.org/seq_tools/splice.html">http://www.fruitfly.org/seq_tools/splice.html</a>                                 |
| SPiCE                      | Threshold to 0.749                                     | Threshold to 0.115                                 | Leman et al. 2018<br><a href="https://sourceforge.net/projects/spicev2-1/">https://sourceforge.net/projects/spicev2-1/</a>                                     |

**References:**

- Brunak S, Engelbrecht J, Knudsen S. Prediction of human mRNA donor and acceptor sites from the DNA sequence. *J Mol Biol.* 1991 Jul 5;220(1):49-65.
- Leman R, Gaildrat P, Gac GL, Ka C, Fichou Y, Audrezet MP, Caux-Moncoutier V, Caputo SM, Boutry-Kryza N, Léone M, Mazoyer S, Bonnet-Dorion F, Sevenet N, Guillaud-Bataille M, Rouleau E, Bressac-de Paillerets B, Wappenschmidt B, Rossing M, Muller D, Bourdon V, Revillon F, Parsons MT, Rousselin A, Davy G, Castelain G, Castéra L, Sokolowska J, Coulet F, Delnatte C, Férec C, Spurdle AB, Martins A, Krieger S, Houdayer C. Novel diagnostic tool for prediction of variant spliceogenicity derived from a set of 395 combined in silico/in vitro studies: an international collaborative effort. *Nucleic Acids Res.* 2018 Sep 6;46(15):7913-7923.
- Reese MG, Eeckman FH, Kulp D, Haussler D. 1997. Improved Splice Site Detection in Genie'. *J Comp Biol* 4(3), 311-23.
- Yeo G, Burge CB. Maximum entropy modeling of short sequence motifs with applications to RNA splicing signals. *J Comput Biol.* 2004;11(2-3):377-94.
