# Supplementary material
Source: publisher figshare collection journal article supplement (https://tandf.figshare.com/articles/dataset/_/11604204)

F145-504

A

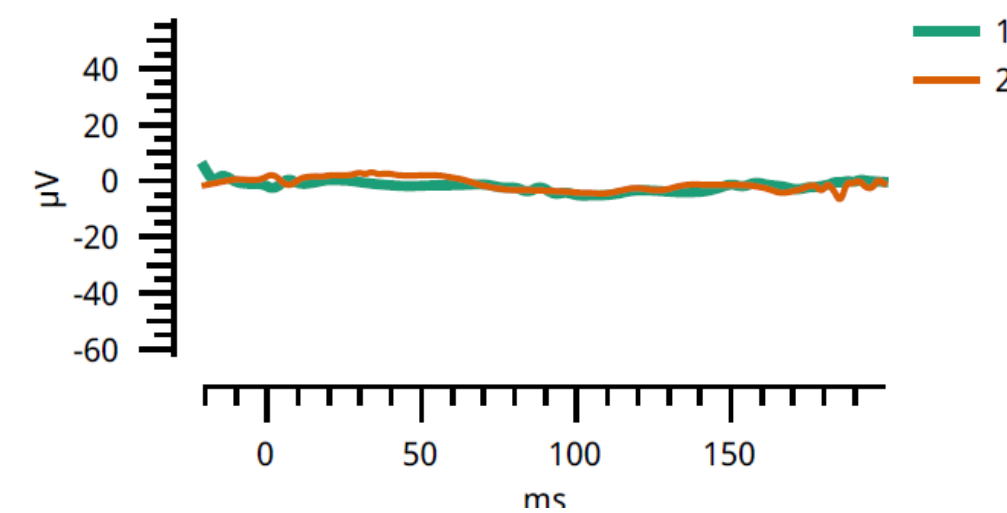

B

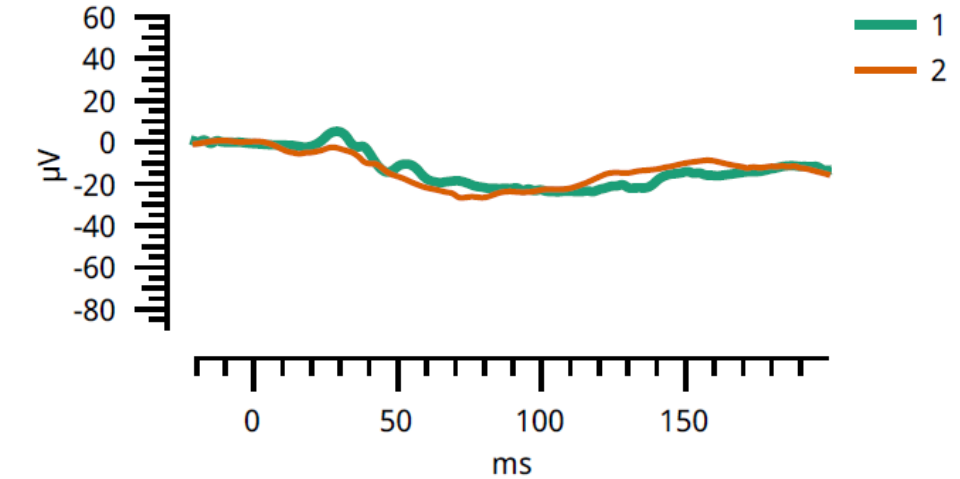

C

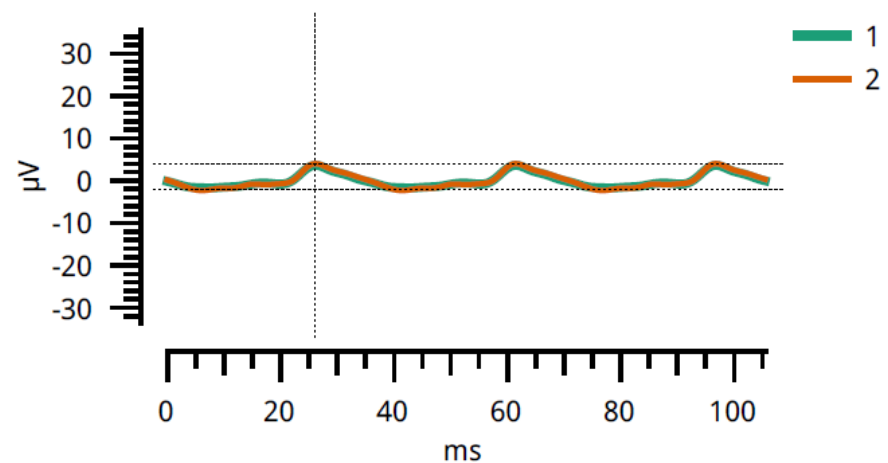

D

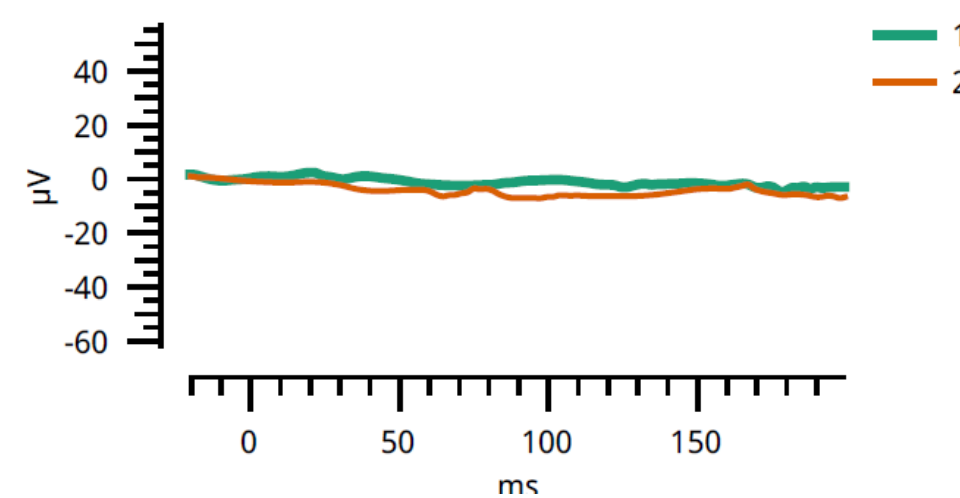

E

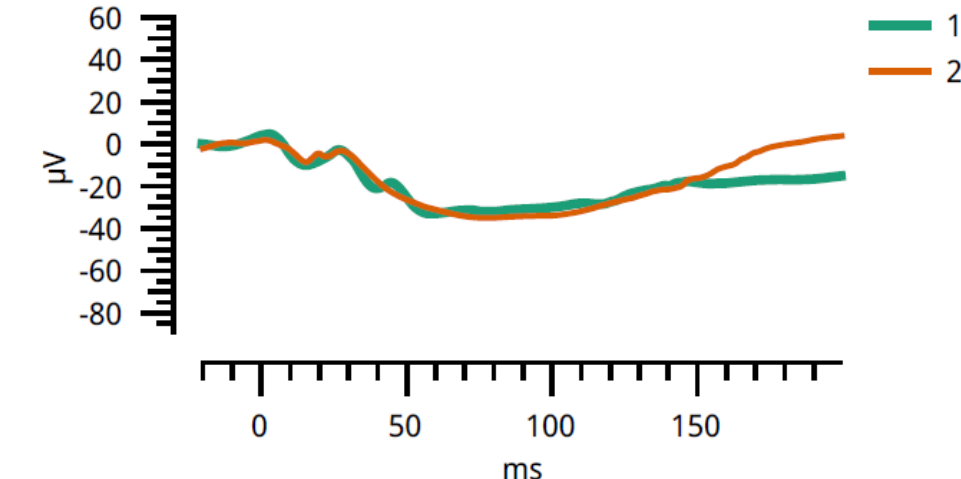

F

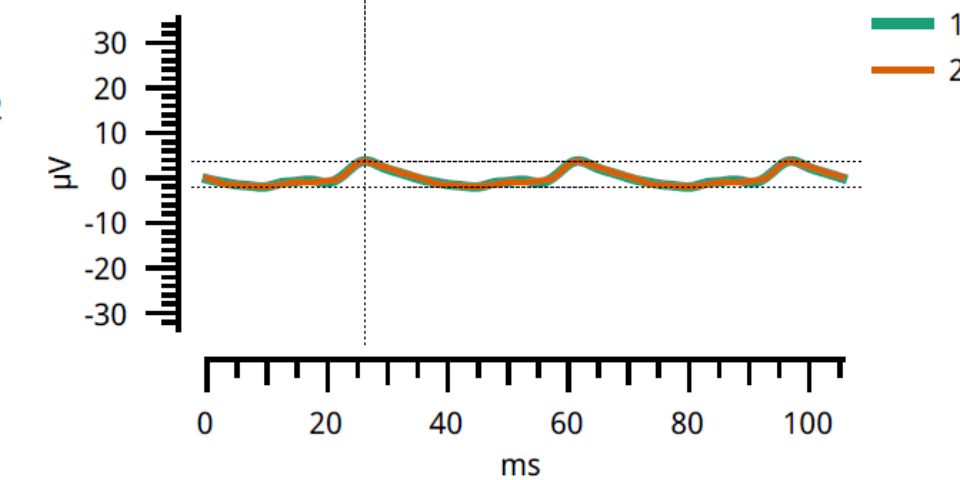

F145-503

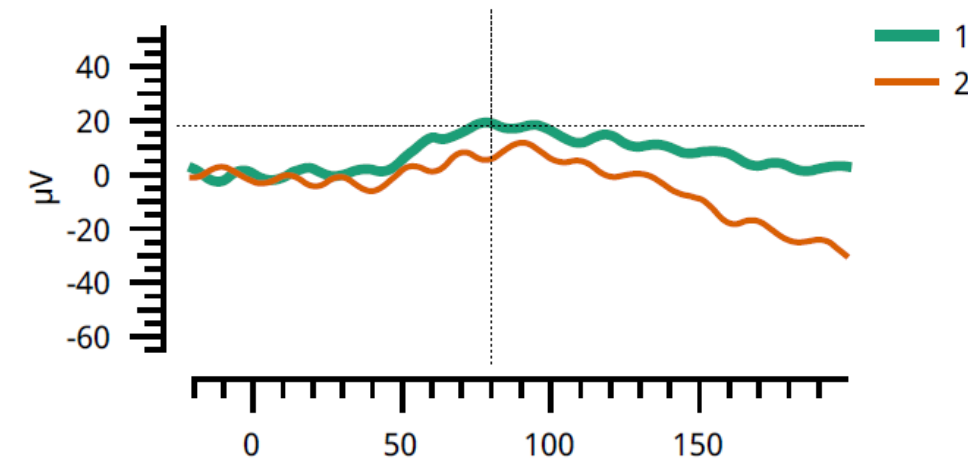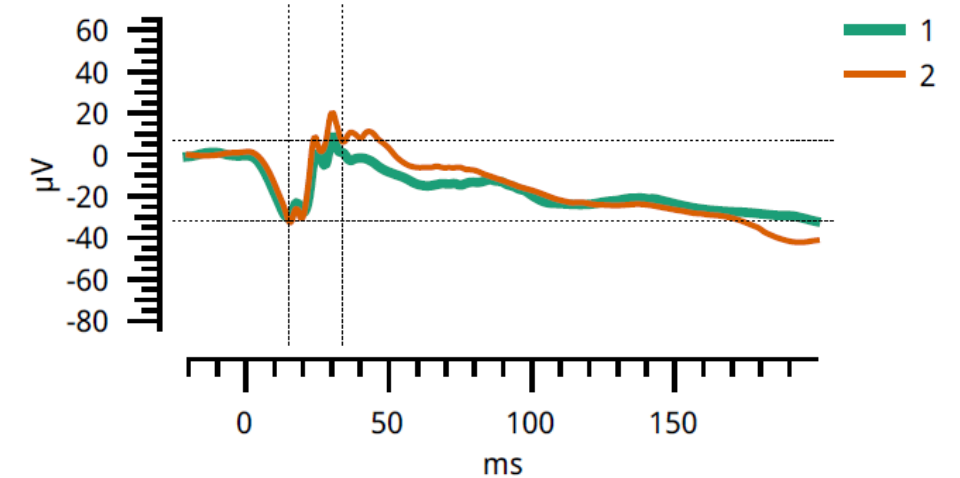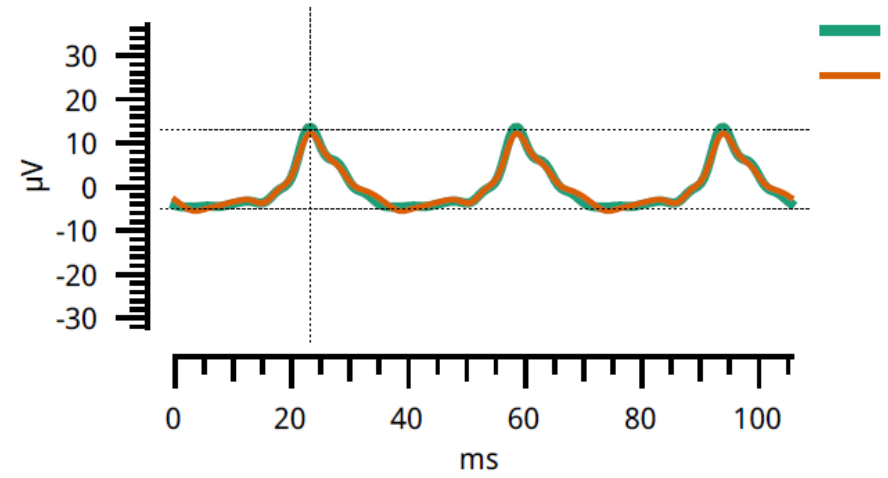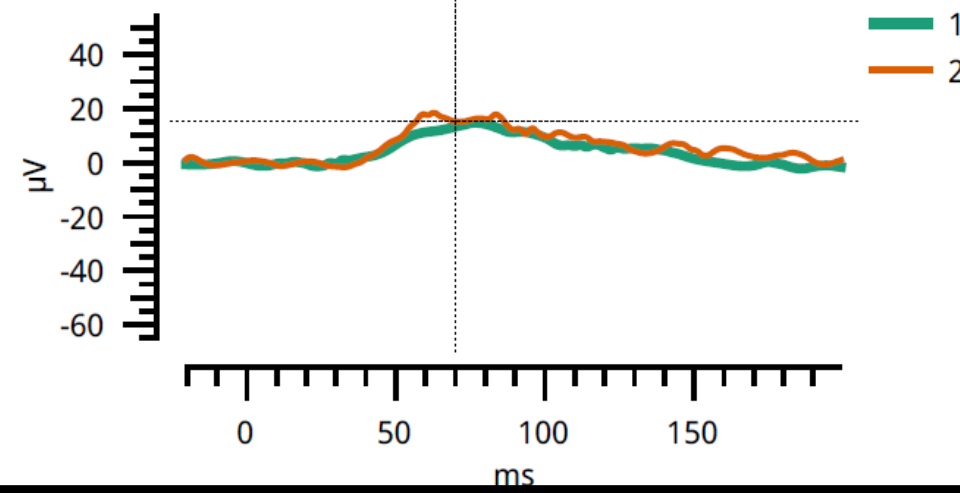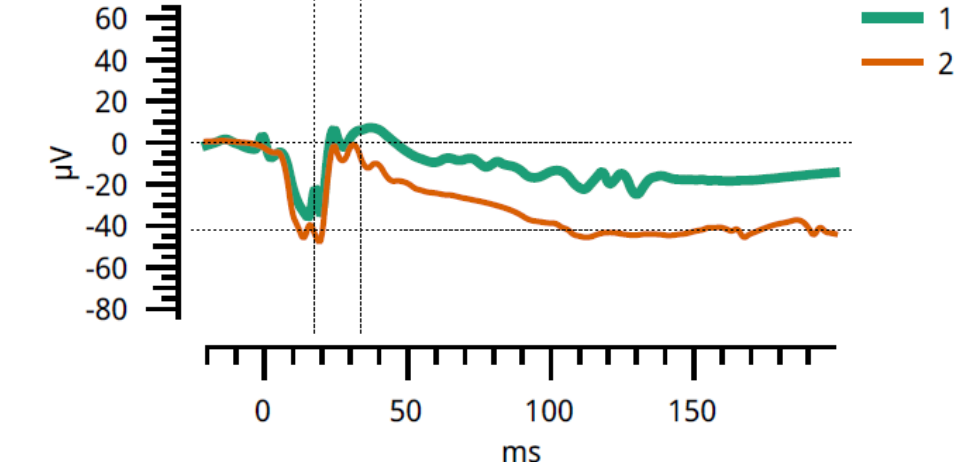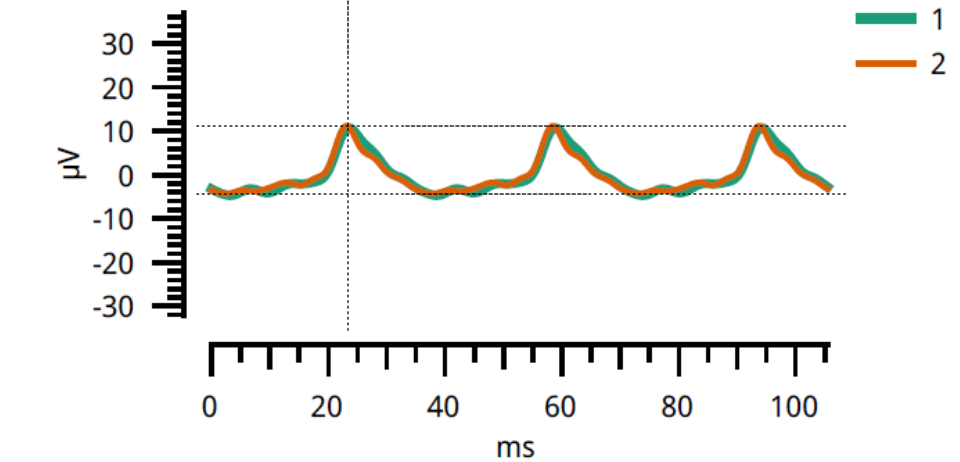

Supplement: Supplementary file 2 [file 1]
